# Supplementary material
Source: publisher site journal article supplement (https://www.spandidos-publications.com/5101/downloadSupplementary)
Supplement: Supplementary file 1 [file downloadSupplementary]

## Sheet: Table S4
Table SIV. Univariate Cox expression analysis of DNASE1.
Cancer	HR	HR.95L	HR.95H	P-value
ACC	1.37697	0.488657	3.8801	0.545056
BLCA	0.535916	0.355053	0.808911	0.00298273
BRCA	1.13812	0.851591	1.52105	0.38195
CESC	0.922074	0.503442	1.68882	0.792734
CHOL	0.913126	0.514462	1.62072	0.756214
COAD	0.99496	0.707192	1.39982	0.976858
DLBC	0.917743	0.275909	3.05264	0.888672
ESCA	1.22852	0.794105	1.90058	0.355256
GBM	1.03744	0.702739	1.53156	0.853262
HNSC	0.65055	0.42847	0.987737	0.0436045
KICH	0.888286	0.519903	1.51769	0.664683
KIRC	1.12818	0.925932	1.37461	0.231493
KIRP	1.03849	0.553189	1.94953	0.906444
LAML	0.74053	0.446836	1.22726	0.24384
LGG	1.06105	0.640526	1.75765	0.818008
LIHC	1.17486	0.742559	1.85883	0.491195
LUAD	1.05408	0.79969	1.38939	0.708595
LUSC	0.99952	0.727892	1.37251	0.997633
MESO	1.0416	0.558347	1.9431	0.898061
OV	0.937467	0.715879	1.22764	0.638839
PAAD	0.480622	0.290687	0.794663	0.00429247
PCPG	1.99739	0.328844	12.1321	0.452262
PRAD	1.69955	0.492698	5.86254	0.401187
READ	1.02188	0.530655	1.96782	0.948389
SARC	1.04802	0.688317	1.5957	0.826916
SKCM	0.84414	0.614178	1.16021	0.296394
STAD	1.0618	0.822514	1.37071	0.645316
TGCT	0.901463	0.0859875	9.45062	0.931049
THCA	1.34135	0.273451	6.5797	0.717397
THYM	0.0257612	0.00371936	0.178428	0.000210984
UCEC	0.734711	0.44961	1.2006	0.218573
UCS	0.741462	0.352159	1.56113	0.431022
UVM	0.436917	0.102479	1.86278	0.263072
